# Supplementary material for: A MicroRNA Signature Associated with Prognosis and Progression in Chronic Lymphocytic Leukemia
Source: Atypon-hosted journal article supplement (doi:10.1056/nejmoa050995), 2005-10-26
Supplement: nejm_calin_1793sa1.pdf [file nejm_calin_1793sa1.pdf]

## Supplementary Appendix

This appendix has been provided by the authors to give readers additional information about their work.

Supplement to: Calin GA, Ferracin M, Cimmino A, et al. A microRNA signature associated with prognosis and progression in chronic lymphocytic leukemia. *N Engl J Med* 2005;353:1793-801.

**Supplemental Table 1.** List of miRNAs associated with prognostic factors and disease progression in CLL patients selected by Prediction Analysis of Microarrays (PAM) and ANOVA analysis (GeneSpring) \*.

| Nr. crt. | PAM signature    | n- score | y+ score | map       | GeneSpring signature    | Anova p-value | map          |
|----------|------------------|----------|----------|-----------|-------------------------|---------------|--------------|
| 1        | <i>mir-222</i>   | -0.022   | 0.0288   | Xp11.2    | <i>mir-34-prec</i>      | 0,048         | 1p36.22      |
| 2        | <i>mir-24-2</i>  | -0.0272  | 0.0355   | 19p13.12  | <i>mir-192-2/3-prec</i> | 0,0457        | 11q13        |
| 3        | <i>mir-181a</i>  | -0.0279  | 0.0364   | 1q32.1    | <i>mir-15a-prec</i>     | 0,0353        | 13q14.3      |
| 4        | <i>mir-15a</i>   | -0.0372  | 0.0485   | 13q14.3   | <i>mir-17</i>           | 0,0257        | 13q31        |
| 5        | <i>mir-24-1</i>  | -0.0427  | 0.0558   | 9q22.1    | <i>mir-15a</i>          | 0,018         | 13q14.3      |
| 6        | <i>mir-195</i>   | -0.053   | 0.0692   | 17p13     | <i>mir-195</i>          | 0,0175        | 17p13        |
| 7        | <i>mir-23a</i>   | -0.0748  | 0.0977   | 19p13.12  | <i>mir-213-prec</i>     | 0,0153        | 1q31.3-q32.1 |
| 8        | <i>mir-23b</i>   | -0.0909  | 0.1187   | 9q22.1    | <i>mir-221</i>          | 0,0105        | Xp11.3       |
| 9        | <i>mir-223</i>   | 0.1056   | -0.1379  | Xq12-13.3 | <i>mir-023b</i>         | 0,00964       | 9q22.1       |
| 10       | <i>mir-29a-2</i> | 0.1139   | -0.1487  | 7q32      | <i>mir-155</i>          | 0,00959       | 21q21        |
| 11       | <i>mir-155</i>   | -0.1155  | 0.1508   | 21q21     | <i>mir-223</i>          | 0,00774       | Xq12-13.3    |
| 12       | <i>mir-221</i>   | -0.1157  | 0.1511   | Xp11.3    | <i>mir-132</i>          | 0,00461       | 17p13.3      |

|    |                        |         |         |             |                        |          |             |
|----|------------------------|---------|---------|-------------|------------------------|----------|-------------|
| 13 | <i>mir-16-1</i>        | -0.1444 | 0.1886  | 13q14.3     | <i>mir-029a-2</i>      | 0,00446  | 7q32        |
| 14 | <i>mir-16-2</i>        | -0.1619 | 0.2113  | 3q26.1      | <i>mir-024-1</i>       | 0,00311  | 9q22.1      |
| 15 | <i>mir-146</i>         | -0.1803 | 0.2354  | 5q34        | <i>mir-29b-2 (102)</i> | 0,000778 | 1q32.2-32.3 |
| 16 | <i>mir-29b-2 (102)</i> | 0.2065  | -0.2696 | 1q32.2-32.3 | <i>mir-146</i>         | 0,000753 | 5q34        |
| 17 | <i>mir-029c</i>        | 0.2174  | -0.2839 | 1q32.2-32.3 | <i>mir-016-1</i>       | 0,00042  | 13q14.3     |
| 18 |                        |         |         |             | <i>mir-016-2</i>       | 0,000327 | 3q26.1      |
| 19 |                        |         |         |             | <i>mir-029c</i>        | 0,000216 | 1q32.2-32.3 |

\* - the list of genes is in ascending order of significance, as represented by score or p value, respectively.

Supplemental Table 2. Predictions of ZAP-70 status and Immunoglobulin heavy chain variable gene status according to miRNA expression in CLL patients\*. The miRNA signature associated with prognostic factors was generated using panel 1 samples and then tested to cross validate the panel 1 and to predict the status of samples from panel 2.

| CLL   | True Value   | Prediction | n margin | y margin |
|-------|--------------|------------|----------|----------|
| CLL01 | Zap70<20 VhM | Zap70<20 V | 1,278    | -1,327   |
| CLL02 | Zap70<20 VhM | Zap70<20 V | 1        | -1       |
| CLL03 | Zap70<20 VhM | Zap70<20 V | 1,247    | -1,348   |
| CLL04 | Zap70<20 VhM | Zap70<20 V | 1,16     | -1,388   |
| CLL05 | Zap70<20 VhM | Zap70<20 V | 1        | -1       |
| CLL06 | Zap70<20 VhM | Zap70<20 V | 1        | -1       |
| CLL07 | Zap70<20 VhM | Zap70<20 V | 1        | -1,122   |
| CLL08 | Zap70<20 VhM | Zap70<20 V | 1,391    | -1,595   |
| CLL09 | Zap70<20 VhM | Zap70<20 V | 0,953    | -1,048   |
| CLL10 | Zap70<20 VhM | Zap70<20 V | 1,059    | -1,333   |
| CLL11 | Zap70<20 VhM | Zap70<20 V | 1        | -1       |
| CLL12 | Zap70<20 VhM | Zap70<20 V | 0,997    | -1,261   |
| CLL13 | Zap70<20 VhM | Zap70<20 V | 1,488    | -1,841   |
| CLL14 | Zap70<20 VhM | Zap70<20 V | 2,171    | -2,582   |
| CLL15 | Zap70<20 VhM | Zap70<20 V | 1,252    | -1,352   |
| CLL16 | Zap70<20 VhM | Zap70<20 V | 1        | -1,188   |
| CLL17 | Zap70<20 VhM | Zap70<20 V | 1,19     | -1,284   |
| CLL18 | Zap70<20 VhM | Zap70<20 V | 1,747    | -2,062   |
| CLL19 | Zap70<20 VhM | Zap70<20 V | 1,503    | -1,833   |
| CLL20 | Zap70<20 VhM | Zap70<20 V | 1        | -1       |
| CLL21 | Zap70<20 VhM | Zap70<20 V | 1        | -1       |
| CLL22 | Zap70<20 VhM | Zap70<20 V | 1        | -1       |
| CLL23 | Zap70<20 VhM | Zap70<20 V | 2,047    | -2,27    |
| CLL24 | Zap70<20 VhM | Zap70<20 V | 1,464    | -1,527   |
| CLL25 | Zap70<20 VhM | Zap70<20 V | 1        | -1       |
| CLL26 | Zap70<20 VhM | Zap70<20 V | 1,034    | -1,034   |
| CLL27 | Zap70<20 VhM | Zap70<20 V | 1,479    | -1,617   |
| CLL28 | Zap70<20 VhM | Zap70<20 V | 2,355    | -2,57    |
| CLL29 | Zap70<20 VhM | Zap70<20 V | 1        | -1       |
| CLL30 | Zap70<20 VhM | Zap70<20 V | 1        | -1       |
| CLL31 | Zap70<20 VhM | Zap70<20 V | 1        | -1       |
| CLL32 | Zap70<20 VhM | Zap70<20 V | 1        | -1       |
| CLL33 | Zap70<20 VhM | Zap70<20 V | 2,229    | -2,496   |

PANEL 1 - 83 correct predictions, 0 incorrect prediction

|       |               |            |        |        |
|-------|---------------|------------|--------|--------|
| CLL34 | Zap70<20 VhM  | Zap70<20 V | 2,683  | -2,931 |
| CLL35 | Zap70<20 VhM  | Zap70<20 V | 1      | -1     |
| CLL36 | Zap70<20 VhM  | Zap70<20 V | 2,578  | -2,768 |
| CLL37 | Zap70<20 VhM  | Zap70<20 V | 2,079  | -2,34  |
| CLL38 | Zap70<20 VhM  | Zap70<20 V | 1,745  | -1,814 |
| CLL39 | Zap70<20 VhM  | Zap70<20 V | 1,559  | -1,699 |
| CLL40 | Zap70<20 VhM  | Zap70<20 V | 2,608  | -3,005 |
| CLL41 | Zap70<20 VhM  | Zap70<20 V | 2,357  | -2,676 |
| CLL42 | Zap70<20 VhM  | Zap70<20 V | 1,102  | -1,303 |
| CLL43 | Zap70<20 VhM  | Zap70<20 V | 1      | -1     |
| CLL44 | Zap70<20 VhM  | Zap70<20 V | 2,464  | -2,629 |
| CLL45 | Zap70<20 VhM  | Zap70<20 V | 1      | -1     |
| CLL46 | Zap70<20 VhM  | Zap70<20 V | 1      | -1     |
| CLL47 | Zap70<20 VhM  | Zap70<20 V | 2,074  | -2,271 |
| CLL48 | Zap70>20 VhUM | Zap70>20 V | -1     | 1      |
| CLL49 | Zap70>20 VhUM | Zap70>20 V | -1,179 | 1,487  |
| CLL50 | Zap70>20 VhUM | Zap70>20 V | -1     | 0,88   |
| CLL51 | Zap70>20 VhUM | Zap70>20 V | -1     | 1      |
| CLL52 | Zap70>20 VhUM | Zap70>20 V | -1,836 | 2,405  |
| CLL53 | Zap70>20 VhUM | Zap70>20 V | -1     | 1      |
| CLL54 | Zap70>20 VhUM | Zap70>20 V | -1,334 | 1,649  |
| CLL55 | Zap70>20 VhUM | Zap70>20 V | -1     | 1,229  |
| CLL56 | Zap70>20 VhUM | Zap70>20 V | -1     | 1      |
| CLL57 | Zap70>20 VhUM | Zap70>20 V | -1     | 1      |
| CLL58 | Zap70>20 VhUM | Zap70>20 V | -1,171 | 1,566  |
| CLL59 | Zap70>20 VhUM | Zap70>20 V | -1     | 1      |
| CLL60 | Zap70>20 VhUM | Zap70>20 V | -1     | 1      |
| CLL61 | Zap70>20 VhUM | Zap70>20 V | -1,505 | 1,976  |
| CLL62 | Zap70>20 VhUM | Zap70>20 V | -1,095 | 1,46   |
| CLL63 | Zap70>20 VhUM | Zap70>20 V | -2,297 | 2,717  |
| CLL64 | Zap70>20 VhUM | Zap70>20 V | -1,187 | 1,381  |
| CLL65 | Zap70>20 VhUM | Zap70>20 V | -1     | 1      |
| CLL66 | Zap70>20 VhUM | Zap70>20 V | -1,344 | 1,479  |
| CLL67 | Zap70>20 VhUM | Zap70>20 V | -1,876 | 2,049  |
| CLL68 | Zap70>20 VhUM | Zap70>20 V | -1     | 1      |
| CLL69 | Zap70>20 VhUM | Zap70>20 V | -1,89  | 1,987  |
| CLL70 | Zap70>20 VhUM | Zap70>20 V | -2,658 | 2,938  |
| CLL71 | Zap70>20 VhUM | Zap70>20 V | -1,556 | 1,967  |
| CLL72 | Zap70>20 VhUM | Zap70>20 V | -2,574 | 2,81   |
| CLL73 | Zap70>20 VhUM | Zap70>20 V | -1     | 1      |

|                                                 |          |               |            |        |        |
|-------------------------------------------------|----------|---------------|------------|--------|--------|
| 50 correct predictions, 0 incorrect predictions | CLL74    | Zap70>20 VhUM | Zap70>20 V | -1     | 1      |
|                                                 | CLL75    | Zap70>20 VhUM | Zap70>20 V | -1     | 1      |
|                                                 | CLL76    | Zap70>20 VhUM | Zap70>20 V | -2,671 | 3,041  |
|                                                 | CLL77    | Zap70>20 VhUM | Zap70>20 V | -1     | 1,376  |
|                                                 | CLL78    | Zap70>20 VhUM | Zap70>20 V | -1     | 1      |
|                                                 | CLL79    | Zap70>20 VhUM | Zap70>20 V | -1,678 | 1,914  |
|                                                 | CLL80    | Zap70>20 VhUM | Zap70>20 V | -2,416 | 2,953  |
|                                                 | CLL81    | Zap70>20 VhUM | Zap70>20 V | -1     | 1      |
|                                                 | CLL82    | Zap70>20 VhUM | Zap70>20 V | -1,782 | 1,846  |
|                                                 | CLL83    | Zap70>20 VhUM | Zap70>20 V | -2,307 | 2,716  |
|                                                 | CLL95    | Zap70<20      | Zap70<20   | 8,494  | -8,494 |
|                                                 | CLL96    | Zap70<20      | Zap70<20   | 1      | -1     |
|                                                 | CLL97    | Zap70<20      | Zap70<20   | 0,763  | -0,763 |
| CLL98                                           | Zap70<20 | Zap70<20      | 11,19      | -11,19 |        |
| CLL99                                           | Zap70<20 | Zap70<20      | 7,561      | -7,561 |        |
| CLL100                                          | Zap70<20 | Zap70<20      | 14,51      | -14,51 |        |
| CLL101                                          | Zap70<20 | Zap70<20      | 5,585      | -5,585 |        |
| CLL102                                          | Zap70<20 | Zap70<20      | 1          | -1     |        |
| CLL103                                          | Zap70<20 | Zap70<20      | 10,09      | -10,09 |        |
| CLL104                                          | Zap70<20 | Zap70<20      | 5,521      | -5,521 |        |
| CLL105                                          | Zap70<20 | Zap70<20      | 7,33       | -7,33  |        |
| CLL106                                          | Zap70<20 | Zap70<20      | 3,264      | -3,264 |        |
| CLL107                                          | Zap70<20 | Zap70<20      | 7,774      | -7,774 |        |
| CLL108                                          | Zap70<20 | Zap70<20      | 5,3        | -5,3   |        |
| CLL109                                          | Zap70<20 | Zap70<20      | 4,34       | -4,34  |        |
| CLL110                                          | Zap70<20 | Zap70<20      | 1,822      | -1,822 |        |
| CLL111                                          | Zap70<20 | Zap70<20      | 3,879      | -3,879 |        |
| CLL112                                          | Zap70<20 | Zap70<20      | 8,514      | -8,514 |        |
| CLL113                                          | Zap70<20 | Zap70<20      | 5,866      | -5,866 |        |
| CLL114                                          | Zap70<20 | Zap70<20      | 10,69      | -10,69 |        |
| CLL115                                          | Zap70<20 | Zap70<20      | 4,141      | -4,141 |        |
| CLL116                                          | Zap70<20 | Zap70<20      | 1          | -1     |        |
| CLL117                                          | Zap70<20 | Zap70<20      | 1          | -1     |        |
| CLL118                                          | Zap70<20 | Zap70<20      | 1          | -1     |        |
| CLL119                                          | Zap70<20 | Zap70<20      | 10,11      | -10,11 |        |
| CLL120                                          | Zap70>20 | Zap70>20      | -3,109     | 3,109  |        |
| CLL121                                          | Zap70>20 | Zap70>20      | -4,722     | 4,722  |        |
| CLL122                                          | Zap70>20 | Zap70>20      | -5,166     | 5,166  |        |
| CLL123                                          | Zap70>20 | Zap70>20      | -7,828     | 7,828  |        |
| CLL124                                          | Zap70>20 | Zap70>20      | -7,468     | 7,468  |        |

|           |          |          |          |        |       |
|-----------|----------|----------|----------|--------|-------|
| PANEL 2 - | CLL125   | Zap70>20 | Zap70>20 | -11,44 | 11,44 |
|           | CLL126   | Zap70>20 | Zap70>20 | -1     | 1     |
|           | CLL127   | Zap70>20 | Zap70>20 | -6,617 | 6,617 |
|           | CLL128   | Zap70>20 | Zap70>20 | -7,011 | 7,011 |
|           | CLL129   | Zap70>20 | Zap70>20 | -7,479 | 7,479 |
|           | CLL130   | Zap70>20 | Zap70>20 | -9,568 | 9,568 |
|           | CLL131   | Zap70>20 | Zap70>20 | -5,286 | 5,286 |
|           | CLL132   | Zap70>20 | Zap70>20 | -5,045 | 5,045 |
|           | CLL133   | Zap70>20 | Zap70>20 | -1     | 1     |
|           | CLL134   | Zap70>20 | Zap70>20 | -1     | 1     |
|           | CLL135   | Zap70>20 | Zap70>20 | -1,324 | 1,324 |
|           | CLL136   | Zap70>20 | Zap70>20 | -1     | 1     |
|           | CLL137   | Zap70>20 | Zap70>20 | -1     | 1     |
|           | CLL138   | Zap70>20 | Zap70>20 | -9,649 | 9,649 |
|           | CLL139   | Zap70>20 | Zap70>20 | -9,264 | 9,264 |
|           | CLL140   | Zap70>20 | Zap70>20 | -7,13  | 7,13  |
| CLL141    | Zap70>20 | Zap70>20 | -11,77   | 11,77  |       |
| CLL142    | Zap70>20 | Zap70>20 | -2,986   | 2,986  |       |
| CLL143    | Zap70>20 | Zap70>20 | -1       | 1      |       |
| CLL144    | Zap70>20 | Zap70>20 | -1       | 1      |       |

Note \* - Prediction for 83 CLLs, from groups 1 and 4 (see text). Classification was generated by the 'Support Vector Machines' algorithm (Kernel Function used: Polynomial Dot Product (Order 2). Diagonal Scaling Factor: 0). 13 miRNA from the signature were used. VhM = mutated; VhUM = unmutated (see text for details).

Supplemental Table 3. **PAM score for each of the components of microRNA signature associated with the time from diagnosis to initial therapy.**

|               | <b>1 score</b> | <b>2 score</b> |
|---------------|----------------|----------------|
| hsa-mir-181a  | <b>0.1862</b>  | <b>-0.0603</b> |
| hsa-mir-155   | <b>0.1409</b>  | <b>-0.0456</b> |
| hsa-mir-146   | <b>0.07</b>    | <b>-0.0227</b> |
| hsa-mir-024-2 | <b>0.0696</b>  | <b>-0.0225</b> |
| hsa-mir-023b  | <b>0.0643</b>  | <b>-0.0208</b> |
| hsa-mir-023a  | <b>0.0587</b>  | <b>-0.019</b>  |
| hsa-mir-222   | <b>0.0458</b>  | <b>-0.0148</b> |
| hsa-mir-221   | <b>0.0343</b>  | <b>-0.0111</b> |
| hsa-mir-029c  | <b>-0.0221</b> | <b>0.0072</b>  |

Note: Score 1 characterize the short time and score 2 the long time from diagnosis to initial therapy in a panel of 94 CLL patients.
